Rezpour J

1 Macula structural and vascular differences in glaucoma eyes with and  
2 without high axial myopia

3

4 Jasmin Rezpour, MD<sup>1,2</sup>, Christopher Bowd, PhD<sup>1</sup>, Jade Dohleman<sup>1</sup>, Akram Belghith, PhD<sup>1</sup>, James A.  
5 Proudfoot, MSc<sup>1</sup>, Mark Christopher, PhD<sup>1</sup>, Leslie Hyman, PhD<sup>3</sup>, Jost B. Jonas, MD<sup>4</sup>, Rafaella C. Penteadó, MD<sup>1</sup>,  
6 Sasan Moghimi, MD<sup>1</sup>, Huiyuan Hou, MD<sup>1</sup>, Massimo A. Fazio, PhD<sup>5,6</sup>, Robert N. Weinreb, MD<sup>1</sup>, Linda M. Zangwill,  
7 PhD<sup>1</sup>

8

9

10

11

12 1 Hamilton Glaucoma Center, Shiley Eye Institute, Viterbi Family Department of Ophthalmology, UC San  
13 Diego, La Jolla, CA, United States

14 2 Department of Ophthalmology, University Medical Center of the Johannes Gutenberg University Mainz,  
15 Germany

16 3 Wills Eye Hospital, Thomas Jefferson University, Philadelphia, PA, United States

17 4 Department of Ophthalmology, Medical Faculty Mannheim, Heidelberg University, Mannheim, Germany

18 5 Department of Ophthalmology and Vision Science, School of Medicine, The University of Alabama at  
19 Birmingham, Birmingham, AL, United States

20 6 Department of Biomedical Engineering, School of Engineering, The University of Alabama at  
21 Birmingham, Birmingham, AL, United States

22

23

24

25

26 Word count: 2907

27

28

29

30

31

32 \*Corresponding author:

33 Linda M. Zangwill

34 9500 Gilman Drive

35 La Jolla, CA 92093-0946

36 Shiley Eye Institute/Hamilton Glaucoma Center

37 Viterbi Family Department of Ophthalmology

38 University of California, San Diego

39 T: (858) 534-7686

40 Email: [lzangwill@health.ucsd.edu](mailto:lzangwill@health.ucsd.edu)

41

42 **Precis**

43 In glaucoma eyes, macula ganglion cell thickness measures were significantly associated  
44 with severity of glaucoma but not axial length suggesting that macula OCT parameters may  
45 be useful in detecting glaucoma in eyes with high myopia.

46

47

**48 Abstract****49 Aims**

50 To assess the thickness of various retinal layers, and the superficial vessel density (sVD) in  
51 the macula of glaucomatous eyes and their associations with axial length (AL) and visual  
52 field mean deviation (VFMD) to identify parameters useful for glaucoma management in  
53 myopic eyes.

**54 Methods**

55 248 glaucoma patients (401 eyes) participating in the Diagnostic Innovations in Glaucoma  
56 Study observational cohort representing 3 axial myopia groups (non-myopia: n=146 eyes;  
57 mild myopia: n=208 eyes; high myopia (AL>26 mm): n=47 eyes) who completed macular  
58 OCT and OCT-Angiography imaging were included. The cross-sectional associations of AL  
59 and VFMD with the thickness of the ganglion cell inner plexiform layer (GCIPL), macular  
60 retinal nerve fiber layer (mRNFL), ganglion cell complex (GCC), sVD and macular choroidal  
61 thickness (mCT) were evaluated.

**62 Results**

63 Thinner Global GCIPL and GCC were significantly associated with worse VFMD ( $R^2=35.1\%$ ;  
64 and  $R^2=33.4\%$ ; respectively  $p<0.001$ ), but not with AL (all  $p>0.350$ ). Thicker mRNFL showed  
65 a weak association with increasing AL ( $R^2=3.4\%$ ;  $p=0.001$ ) and a positive association with  
66 VFMD (global  $R^2=20.5\%$ ;  $p<0.001$ ). Lower sVD was weakly associated with increasing AL  
67 ( $R^2=2.3\%$ ;  $p=0.016$ ) and more strongly associated with more severe glaucoma VFMD  
68 ( $R^2=31.8\%$ ;  $p<0.001$ ). Thinner mCT was associated with increasing AL ( $R^2=17.3\%$   $p<0.001$ )  
69 and not associated with VFMD ( $P=0.262$ ). mRNFL was thickest while mCT was thinnest in all  
70 sectors of high myopic eyes.

**71 Conclusions**

72 GCIPL and GCC thinned with increasing severity of glaucoma but were not significantly  
73 associated with axial length. GCIPL and GCC thickness may be useful clinical parameters to  
74 identify glaucoma in myopic eyes.

## 75 **Introduction**

76

77 With its potential vision threatening risk and with its prevalence increasing globally, myopia,  
78 especially high myopia, has become a major concern around the world.<sup>1</sup>

79 Although optical coherence tomography (OCT) based measurements of peripapillary retinal  
80 nerve fiber layer (pRNFL) thickness can accurately discriminate between healthy and  
81 glaucomatous eyes,<sup>2</sup> there is concern that in myopic eyes (and especially in high myopic  
82 eyes) the diagnostic accuracy of OCT measures is decreased. Optic disc changes in myopic  
83 eyes such as morphologic changes in the parapapillary region and optic disc enlargement  
84 pose significant challenges to the use of optical imaging and clinical optic disc evaluation to  
85 detect and monitor glaucoma (Figure 1).<sup>1,3</sup> This is due in part to difference in the regional  
86 arrangement of the peripapillary retinal nerve fibers between myopic eyes and emmetropic  
87 eyes that may result in sectoral values incorrectly classified as outside normal limits by  
88 instrument-specific software analysis in healthy myopic eyes.<sup>4,5</sup>

89

90 Approximately 50% of the retinal ganglion cells are concentrated within 10 degree of the  
91 fovea<sup>6</sup> making the macula an useful region for diagnosing optic neuropathies including  
92 glaucoma, especially in myopic eyes because myopic axial elongation primarily affects the  
93 optic nerve head region. Previous studies have reported that early glaucomatous damage  
94 can be detected in the macula region<sup>7</sup> and that measurements of the ganglion cell inner  
95 plexiform layer (GCIPL) can be used for detecting glaucoma in highly myopic eyes.<sup>8-12</sup>  
96 However, little information is available about differences in the topographic distribution of the  
97 thickness of the various macular retinal layers and the retinal vessel density in glaucomatous  
98 eyes with and without myopia. Sectoral measurements of the underlying macular vasculature  
99 may offer additional insight into differences in glaucomatous eyes with and without myopia.

100

101 Several studies using OCT-Angiography (OCTA) have demonstrated a strong relationship  
102 between macular capillary density and the severity of glaucoma.<sup>13,14</sup> Furthermore recent  
103 studies have reported the peripapillary choroid to be thinner in highly myopic eyes compared

Rezapour J

104 to non-myopic eyes.<sup>15 16</sup> However, few studies have assessed macular choroidal thickness in  
105 highly myopic eyes<sup>17 18</sup> and to date, to the best of our knowledge, no study has documented  
106 the local distribution of macular choroidal thickness in glaucomatous eyes with and without  
107 high myopia.

108

109 The purpose of this study was to characterize the local distribution of GCIPL, GCC, macular  
110 retinal nerve fiber layer (mRNFL), choroidal thickness and vessel density in glaucoma eyes  
111 with and without axial myopia. By better understanding how the topographic distribution of  
112 these parameters varies with axial length and severity of disease, macula parameters that  
113 may be useful for detecting and monitoring glaucoma in myopic eyes can be identified.

114

## 115 **Methods**

### 116 **Study Sample**

117 This cross-sectional study included all glaucoma patients enrolled in the University of  
118 California, San Diego Diagnostic Innovations in Glaucoma Study (DIGS; [clinicaltrials.gov](https://clinicaltrials.gov/ct2/show/study/NCT00221897)  
119 identifier NCT00221897) with available axial length measurements and good quality macula  
120 OCT scans acquired between 2015 and 2020. The study was approved by the institutional  
121 review board of the University of California San Diego and according to the tenets of the  
122 Declaration of Helsinki written informed consent was obtained from all patients. As described  
123 previously;<sup>19</sup> participants underwent a complete ophthalmologic examination including  
124 assessment of refractive error, axial length measurement (IOLMaster, Carl Zeiss Meditec,  
125 Dublin, CA), visual field testing, simultaneous stereophotography of the optic disc and  
126 macula, and macular OCT and OCTA imaging. Study participants were  $\geq 18$  years with best-  
127 corrected visual acuity  $\geq 20/40$  and open anterior chamber angles at baseline.

128

129 Visual field (VF) testing was performed using the standard Humphrey Field Analyzer 24-2  
130 Swedish interactive thresholding algorithm. Repeatable glaucomatous VF damage was  
131 defined as the presence of glaucomatous optic nerve head (ONH) damage based on masked  
132 assessment by two trained observers and glaucomatous VF damage.<sup>19</sup> ONH

Rezapour J

133 stereophotographs of highly myopic eyes were graded for glaucoma by two experts (CB and  
134 JR) after training with a senior consultant (JBJ). Diagnosis was defined by consensus  
135 between the two graders and adjudication by the senior consultant in case of disagreement.

136

### 137 **Myopia definition**

138 Because a change in refractive error can occur after refractive or cataract surgery, myopia  
139 was classified by axial length into the following 3 groups.

140 -No myopia: axial length  $\leq$  24.0 mm

141 -Mild myopia: 24.0mm < axial length  $\leq$  26.0 mm

142 -High myopia: axial length > 26.0 mm

143

### 144 **Optical coherence tomography and optical coherence tomography angiography**

#### 145 **imaging**

146 OCT imaging of the macula was performed with the Spectralis OCT (version 6.10;  
147 Heidelberg Engineering Inc, Heidelberg, Germany). Details of this instrument have been  
148 previously described.<sup>14</sup> Macula horizontal posterior pole (p-Pole) scans covering an area of  
149 30° x 25° (6 x 6 mm) were obtained. GCIPL, mRNFL and GCC (GCIPL + mRNFL) thickness  
150 measurements were generated from each retinal layer from the central 1-, 3-, and 6-mm  
151 circles as inner rings (1- and 3-mm circle) and outer rings (3- and 6-mm circle) according to  
152 the Early Treatment Diabetic Retinopathy Study defined sectors (temporal, superior, nasal,  
153 and inferior).

154

155 OCTA imaging of the macula was performed with the Avanti AngioVue OCT system (version  
156 2017.1.0.151; Optovue, Inc., Fremont CA, USA).<sup>20</sup> Macular whole image vessel density was  
157 calculated on a 3 x 3 mm<sup>2</sup> field macula scan (304 B-scans x 304 A-scans per B-scan)  
158 centered on the fovea. Whole image vessel density of the temporal, superior, nasal, and  
159 inferior sectors were reported. Macular parafoveal superficial VD (sVD) was calculated within

Rezapour J

160 an annulus centered on the fovea, with an inner diameter of 1 mm and an outer diameter of  
161 2.5 mm.

162

163 All images were reviewed by the Imaging Data Evaluation and Analysis (IDEA) Reading  
164 Center for image quality, and accurate segmentation of the mRNFL, ganglion cell layer  
165 (GCL), and inner plexiform layer (IPL). The automated Spectralis software segmentation was  
166 manually corrected if needed, according to the standard IDEA Reading Center protocols.<sup>19</sup>

167

### 168 **Choroidal thickness measurement using deep learning**

169 As choroidal thickness is not available from standard software, custom deep learning-based  
170 software was developed to automatically measure mCT.<sup>21</sup> A trained grader (JR) manually  
171 segmented the Bruch's Membrane (BM) / RPE complex and the posterior boundary of the  
172 choroid in 120 p-Pole scans in the SPX software (version 1.9.204.0; Heidelberg Engineering  
173 Inc, Heidelberg, Germany) in a subset of 20 eyes, which was used as ground truth to train a  
174 deep convolutional neural network model (BCDU-Net).<sup>22</sup> Two thousand two hundred fifty  
175 seven scans (753 eyes) with automated choroid segmentation were reviewed for accuracy  
176 (JR). The overall performance of the deep learning algorithm for segmenting the choroid was  
177 very good with 400/401 (99.8%) eyes included (no myopia: 146/146 (100%), mild myopia:  
178 208/208 (100%) and high myopia: 46/47 (97.9%)).

179

180 Macular choroidal thickness (mCT) was obtained for the inner and outer rings of the macular  
181 p-Pole scans defined above. Each ring was subdivided into temporal, superior, nasal, and  
182 inferior sectors and global and sectoral choroidal thickness was calculated. The MCT was  
183 defined as the perpendicular distance between the posterior border of BM / retinal pigment  
184 epithelium (RPE) complex and the posterior boundary of the choroid.

185

### 186 **Statistical Analyses**

Rezapour J

187 Data is presented as mean (95% confidence interval (CI)) and count (percentage) for  
 188 continuous and categorical variables, respectively. Patient and eye characteristics were  
 189 compared across myopia groups using analysis of variance (ANOVA) and chi-squared tests  
 190 for continuous and categorical patient-level variables (respectively) and linear mixed effects  
 191 models for continuous eye-level variables, with a random intercept to account for within-  
 192 patient correlation. Univariable and age and VFMD adjusted multivariable models were  
 193 applied to evaluate the association between axial length and ocular parameters. P-values  
 194 less than 0.05 were considered statistically significant. All statistical analyses were  
 195 performed using R (version 3.6.3).

196

## 197 Results

198 Four-hundred-one glaucoma eyes of 248 patients were included with 146 eyes (87 patients)  
 199 in the non-myopic group, 208 eyes (125 patients) in the mild myopic group, and 47 highly  
 200 myopic eyes (36 patients) (Table 1). All p-values are reported as age-adjusted.

|                               | No axial myopia<br>(n=87; 146 eyes) | Mild axial myopia<br>(n=125; 208 eyes) | High axial myopia<br>(n=36; 47 eyes) | Overall (n=248, 401<br>eyes) | P-value                 | Age-<br>adjusted<br>p-value |
|-------------------------------|-------------------------------------|----------------------------------------|--------------------------------------|------------------------------|-------------------------|-----------------------------|
| <b>Age</b>                    | 76.5 (74.1, 78.8)                   | 73.0 (71.1, 75.0)                      | 67.5 (63.7, 71.4)                    | 73.4 (72.0, 74.8)            | <0.001 <sup>1,2,3</sup> |                             |
| <b>Gender</b>                 |                                     |                                        |                                      |                              |                         |                             |
| Female                        | 55 (63.2%)                          | 55 (44.0%)                             | 13 (36.1%)                           | 123 (49.6%)                  | 0.005 <sup>1,2</sup>    |                             |
| Male                          | 32 (36.8%)                          | 70 (56.0%)                             | 23 (63.9%)                           | 125 (50.4%)                  |                         |                             |
| <b>Race</b>                   |                                     |                                        |                                      |                              |                         |                             |
| African<br>Descent            | 21 (24.1%)                          | 22 (17.6%)                             | 3 (8.3%)                             | 46 (18.5%)                   | 0.057 <sup>2,3</sup>    |                             |
| Asian<br>Descent              | 7 (8.0%)                            | 15 (12.0%)                             | 10 (27.8%)                           | 32 (12.9%)                   |                         |                             |
| European<br>Descent           | 57 (65.5%)                          | 84 (67.2%)                             | 21 (58.3%)                           | 162 (65.3%)                  |                         |                             |
| <b>Axial length<br/>(mm)</b>  | 23.4 (23.3, 23.6)                   | 24.9 (24.8, 25.0)                      | 26.5 (26.3, 26.7)                    | 24.5 (24.4, 24.7)            | <0.001 <sup>1,2,3</sup> | <0.001 <sup>1,2,3</sup>     |
| <b>SE (dpt)</b>               | -0.00 (-0.41, 0.41)                 | -1.50 (-1.85, -1.16)                   | -2.84 (-3.42, -2.26)                 | -1.12 (-1.44, -0.79)         | <0.001 <sup>1,2,3</sup> | <0.001 <sup>1,2,3</sup>     |
| <b>CCT</b>                    | 537.9 (529.5, 546.3)                | 534.5 (527.4, 541.7)                   | 535.5 (523.0, 548.1)                 | 535.9 (530.2, 541.6)         | 0.803                   | 0.637                       |
| <b>VFMD (db)</b>              | -5.75 (-7.05, -4.45)                | -7.10 (-8.19, -6.00)                   | -7.18 (-9.32, -5.04)                 | -6.61 (-7.43, -5.80)         | 0.251                   |                             |
| <b>IOP<br/>(mmHg)</b>         | 14.6 (13.7, 15.5)                   | 13.8 (13.1, 14.6)                      | 14.1 (12.6, 15.5)                    | 14.1 (13.6, 14.7)            | 0.423                   | 0.093 <sup>1</sup>          |
| <b>Cataract<br/>Surgery</b>   |                                     |                                        |                                      |                              |                         |                             |
| Yes                           | 63 (43.2%)                          | 78 (37.5%)                             | 14 (29.8%)                           | 155 (38.7%)                  | 0.236                   |                             |
| No                            | 83 (56.8%)                          | 130 (62.5%)                            | 33 (70.2%)                           | 246 (61.3%)                  |                         |                             |
| <b>Refractive<br/>Surgery</b> |                                     |                                        |                                      |                              |                         |                             |
| Yes                           | 0 (0.0%)                            | 12 (5.8%)                              | 2 (4.3%)                             | 14 (3.5%)                    | 0.003 <sup>1</sup>      |                             |
| No                            | 146 (100.0%)                        | 196 (94.2%)                            | 45 (95.7%)                           | 387 (96.5%)                  |                         |                             |

201 **Table 1:** Glaucoma patient and eye characteristics by myopia group.  
 202 Results are presented as mean (95% confidence interval) or percentage. Race was compared using  
 203 a chi-squared test. Continuous variables were compared using ANOVA (for age) or linear mixed models  
 204 (for eye level data).  
 205 No myopia: AL ≤24.0mm; Mild myopia: AL: >24mm and ≤26.0mm; High myopia: AL >26.0mm  
 206 Missing 13<sup>a</sup>, 2<sup>b</sup>, and 8<sup>c</sup> values.  
 207 <sup>1</sup> No vs. Mild Myopia p < 0.05; <sup>2</sup> No vs. High Myopia p < 0.05; <sup>3</sup> Mild vs. High Myopia p < 0.05  
 208 Abbreviations: BMO; Bruch's membrane opening, IOP; intraocular pressure, MD; mean deviation



Rezapour J

209 The participants in the high myopia group were significantly younger (mean [95% CI] 67.5  
210 [63.7, 71.4] years) than the members of the mild (73.0 [71.1, 75.0] years) myopic group and  
211 the non-myopic individuals (76.5 [74.1, 78.8] years) groups ( $p<0.001$ ). There was a trend of a  
212 higher proportion of individuals of Asian descent in the high myopia group compared to the  
213 no-myopic and the mild myopic group ( $p=0.06$ ).

214

215 There was no significant difference in intraocular pressure ( $p=0.09$ ), central corneal thickness  
216 ( $p=0.64$ ) and BMO area ( $p=0.51$ ) among the three groups (Table 1). Non-myopes tended  
217 ( $p=0.131$ ) to have less severe glaucoma than the mild myopic group and the high myopic  
218 group (mean visual field mean deviation (MD) -5.75 dB, -7.10 dB and -7.18 dB, respectively).

219

#### 220 **Macular Thickness Measurements**

221 A total of 43 eyes were excluded from the analysis for not meeting image quality criteria  
222 (Spectralis quality score  $>15$  dB or segmentation failure) with 14/140 (10.1%), 12/220 (5.5%)  
223 and 17/64 (26.6%) eyes excluded from the no-, mild- and high-axial myopia groups,  
224 respectively. Macular thickness measures are presented in Figure 2 and Supplemental Table  
225 1.

226

#### 227 **Associations with Axial Length**

228 There were no statistically significant associations between global and sectoral GCC or  
229 GCPIIL thickness measurements and axial length except for a weak association of the GCIPL  
230 outer nasal sector ( $R^2=1.9%$ ,  $p=0.016$ ). All mRNFL measurements, except for the inner  
231 temporal and outer inferior sector were significantly (all  $p<0.024$ ) but relatively weakly (all  $R^2$   
232  $< 5%$ ) associated with axial length. We found weak associations between global and sectoral  
233 vessel density measurements and axial length (all  $R^2\leq 3.2%$ , all  $p<0.05$ ) and stronger  
234 associations between choroidal thickness measures and axial length ( $R^2$  range: 9.6%-19.3%,  
235 all  $p<0.001$ ) (Table 2).

236

|                                  | Patients (eyes) | Univariable Regression  |                          | Multivariable Regression |                              |
|----------------------------------|-----------------|-------------------------|--------------------------|--------------------------|------------------------------|
|                                  |                 | Estimate                | R <sup>2</sup> (p-value) | Estimate                 | R <sup>2</sup> (%) (p-value) |
| <b>Age</b>                       | N=248 (401)     | -0.26 (-0.59, 0.07)     | 0.1 (0.121)              | -0.25 (-0.58, 0.07)      | 0.1 (0.130)                  |
| <b>VFMD</b>                      | N=248 (401)     | -0.35 (-0.97, 0.27)     | 0.4 (0.272)              | -0.53 (-1.17, 0.12)      | 0.8 (0.110)                  |
| <b>Spectralis GCIPL (µm)</b>     |                 |                         |                          |                          |                              |
| Global                           | N=248 (401)     | -0.29 (-1.21, 0.63)     | 0.1 (0.531)              | -0.41 (-1.19, 0.36)      | 0.4 (0.299)                  |
| Inner ring                       | N=248 (401)     | -0.32 (-1.58, 0.94)     | 0.1 (0.618)              | -0.36 (-1.42, 0.69)      | 0.2 (0.498)                  |
| Outer ring                       | N=248 (401)     | -0.26 (-0.92, 0.40)     | 0.2 (0.443)              | -0.45 (-1.05, 0.14)      | 0.7 (0.136)                  |
| Inner temporal                   | N=248 (401)     | 0.14 (-1.26, 1.54)      | 0.0 (0.843)              | 0.29 (-0.86, 1.43)       | 0.1 (0.625)                  |
| Inner superior                   | N=248 (401)     | -0.60 (-1.90, 0.71)     | 0.3 (0.370)              | -0.82 (-2.01, 0.37)      | 0.6 (0.180)                  |
| Inner nasal                      | N=248 (401)     | -0.61 (-1.96, 0.74)     | 0.3 (0.380)              | -0.76 (-1.99, 0.47)      | 0.5 (0.226)                  |
| Inner inferior                   | N=248 (401)     | -0.21 (-1.69, 1.26)     | 0.0 (0.780)              | -0.11 (-1.37, 1.15)      | 0.0 (0.859)                  |
| Outer temporal                   | N=248 (401)     | -0.20 (-1.01, 0.62)     | 0.1 (0.637)              | -0.20 (-0.91, 0.51)      | 0.1 (0.577)                  |
| Outer superior                   | N=248 (401)     | -0.21 (-0.92, 0.50)     | 0.1 (0.567)              | -0.47 (-1.14, 0.20)      | 0.6 (0.170)                  |
| Outer nasal                      | N=248 (401)     | -0.49 (-1.28, 0.30)     | 0.5 (0.225)              | -0.92 (-1.66, -0.18)     | 1.9 (0.016)                  |
| Outer inferior                   | N=248 (401)     | -0.18 (-0.84, 0.48)     | 0.1 (0.595)              | -0.27 (-0.90, 0.37)      | 0.2 (0.411)                  |
| <b>Spectralis RNFL (µm)</b>      |                 |                         |                          |                          |                              |
| Global                           | N=248 (401)     | 0.33 (-0.05, 0.71)      | 0.9 (0.092)              | 0.59 (0.24, 0.95)        | 3.4 (0.001)                  |
| Inner ring                       | N=248 (401)     | 0.32 (0.06, 0.59)       | 1.8 (0.018)              | 0.49 (0.22, 0.76)        | 3.9 (<0.001)                 |
| Outer ring                       | N=248 (401)     | 0.33 (-0.21, 0.87)      | 0.5 (0.233)              | 0.70 (0.21, 1.19)        | 2.6 (0.005)                  |
| Inner temporal                   | N=248 (401)     | 0.04 (-0.16, 0.24)      | 0.1 (0.671)              | 0.19 (-0.01, 0.39)       | 1.0 (0.066)                  |
| Inner superior                   | N=248 (401)     | 0.55 (0.18, 0.92)       | 2.7 (0.004)              | 0.74 (0.35, 1.12)        | 4.4 (<0.001)                 |
| Inner nasal                      | N=248 (401)     | 0.44 (0.09, 0.79)       | 1.9 (0.014)              | 0.62 (0.25, 0.98)        | 3.4 (<0.001)                 |
| Inner inferior                   | N=248 (401)     | 0.27 (-0.09, 0.63)      | 0.7 (0.141)              | 0.44 (0.09, 0.80)        | 1.8 (0.015)                  |
| Outer temporal                   | N=248 (401)     | 0.07 (-0.13, 0.28)      | 0.2 (0.483)              | 0.23 (0.03, 0.44)        | 1.6 (0.024)                  |
| Outer superior                   | N=248 (401)     | 0.44 (-0.28, 1.16)      | 0.5 (0.231)              | 0.83 (0.15, 1.51)        | 1.8 (0.017)                  |
| Outer nasal                      | N=248 (401)     | 0.60 (-0.23, 1.43)      | 0.6 (0.160)              | 1.14 (0.36, 1.93)        | 2.7 (0.004)                  |
| Outer inferior                   | N=248 (401)     | 0.17 (-0.57, 0.91)      | 0.1 (0.654)              | 0.59 (-0.09, 1.26)       | 0.9 (0.088)                  |
| <b>Spectralis GCC (µm)</b>       |                 |                         |                          |                          |                              |
| Global                           | N=248 (401)     | 0.03 (-1.19, 1.25)      | 0.0 (0.964)              | 0.18 (-0.88, 1.25)       | 0.0 (0.737)                  |
| Inner ring                       | N=248 (401)     | 0.00 (-1.41, 1.41)      | 0.0 (0.998)              | 0.12 (-1.10, 1.35)       | 0.0 (0.844)                  |
| Outer ring                       | N=248 (401)     | 0.07 (-1.04, 1.17)      | 0.0 (0.909)              | 0.25 (-0.75, 1.24)       | 0.1 (0.625)                  |
| Inner temporal                   | N=248 (401)     | 0.18 (-1.24, 1.61)      | 0.0 (0.800)              | 0.47 (-0.72, 1.66)       | 0.2 (0.438)                  |
| Inner superior                   | N=248 (401)     | -0.06 (-1.59, 1.48)     | 0.0 (0.943)              | -0.08 (-1.53, 1.36)      | 0.0 (0.910)                  |
| Inner nasal                      | N=248 (401)     | -0.16 (-1.68, 1.37)     | 0.0 (0.840)              | -0.14 (-1.58, 1.31)      | 0.0 (0.852)                  |
| Inner inferior                   | N=248 (401)     | 0.06 (-1.68, 1.80)      | 0.0 (0.947)              | 0.33 (-1.20, 1.85)       | 0.1 (0.676)                  |
| Outer temporal                   | N=248 (401)     | -0.12 (-1.05, 0.82)     | 0.0 (0.805)              | 0.03 (-0.80, 0.87)       | 0.0 (0.940)                  |
| Outer superior                   | N=248 (401)     | 0.23 (-1.07, 1.53)      | 0.0 (0.725)              | 0.36 (-0.87, 1.58)       | 0.1 (0.569)                  |
| Outer nasal                      | N=248 (401)     | 0.12 (-1.31, 1.55)      | 0.0 (0.873)              | 0.22 (-1.13, 1.56)       | 0.0 (0.750)                  |
| Outer inferior                   | N=248 (401)     | -0.02 (-1.30, 1.27)     | 0.0 (0.978)              | 0.31 (-0.88, 1.51)       | 0.1 (0.608)                  |
| <b>Avanti GCC (µm)</b>           |                 |                         |                          |                          |                              |
| Whole image                      | N=204 (317)     | -0.04 (-1.44, 1.36)     | 0.0 (0.954)              | 0.02 (-1.23, 1.26)       | 0.0 (0.979)                  |
| Parafovea                        | N=204 (317)     | -0.15 (-1.64, 1.33)     | 0.0 (0.839)              | -0.13 (-1.45, 1.19)      | 0.0 (0.850)                  |
| Temporal                         | N=204 (317)     | -0.11 (-1.60, 1.38)     | 0.0 (0.888)              | 0.07 (-1.20, 1.33)       | 0.0 (0.920)                  |
| Superior                         | N=203 (316)     | -0.15 (-1.81, 1.50)     | 0.0 (0.857)              | -0.16 (-1.76, 1.43)      | 0.0 (0.839)                  |
| Nasal                            | N=204 (317)     | -0.11 (-1.71, 1.48)     | 0.0 (0.891)              | -0.25 (-1.75, 1.26)      | 0.0 (0.750)                  |
| Inferior                         | N=204 (316)     | -0.31 (-2.14, 1.52)     | 0.0 (0.739)              | -0.28 (-1.89, 1.34)      | 0.0 (0.739)                  |
| <b>Avanti Vessel Density (%)</b> |                 |                         |                          |                          |                              |
| Whole image                      | N=204 (317)     | -0.35 (-0.87, 0.17)     | 0.7 (0.191)              | -0.54 (-0.97, -0.10)     | 2.3 (0.016)                  |
| Parafovea                        | N=204 (317)     | -0.42 (-0.97, 0.13)     | 0.9 (0.138)              | -0.63 (-1.09, -0.18)     | 2.8 (0.007)                  |
| Temporal                         | N=204 (317)     | -0.38 (-0.95, 0.18)     | 0.7 (0.183)              | -0.49 (-0.96, -0.01)     | 1.5 (0.046)                  |
| Superior                         | N=203 (316)     | -0.31 (-0.88, 0.26)     | 0.4 (0.293)              | -0.59 (-1.09, -0.09)     | 2.0 (0.022)                  |
| Nasal                            | N=204 (317)     | -0.48 (-1.05, 0.08)     | 1.1 (0.096)              | -0.75 (-1.24, -0.25)     | 3.2 (0.004)                  |
| Inferior                         | N=204 (316)     | -0.57 (-1.26, 0.11)     | 1.0 (0.102)              | -0.78 (-1.36, -0.21)     | 2.7 (0.008)                  |
| <b>Spectralis Choroid (µm)</b>   |                 |                         |                          |                          |                              |
| Global                           | N=247 (400)     | -10.95 (-14.96, -6.94)  | 8.9 (<0.001)             | -15.17 (-18.96, -11.38)  | 17.3 (<0.001)                |
| Inner Ring                       | N=247 (400)     | -11.51 (-16.18, -6.84)  | 7.5 (<0.001)             | -16.04 (-20.49, -11.58)  | 14.6 (<0.001)                |
| Outer Ring                       | N=247 (400)     | -10.81 (-14.70, -6.92)  | 9.2 (<0.001)             | -14.97 (-18.64, -11.30)  | 17.9 (<0.001)                |
| Inner Temporal                   | N=247 (400)     | -8.05 (-12.53, -3.57)   | 4.1 (<0.001)             | -12.33 (-16.64, -8.02)   | 9.6 (<0.001)                 |
| Inner Superior                   | N=247 (400)     | -12.56 (-17.72, -7.40)  | 7.3 (<0.001)             | -17.30 (-22.26, -12.34)  | 13.8 (<0.001)                |
| Inner Nasal                      | N=247 (400)     | -16.87 (-22.38, -11.36) | 11.1 (<0.001)            | -21.73 (-27.06, -16.41)  | 17.9 (<0.001)                |
| Inner Inferior                   | N=247 (400)     | -9.28 (-14.19, -4.37)   | 4.5 (<0.001)             | -14.19 (-18.87, -9.51)   | 10.8 (<0.001)                |
| Outer Temporal                   | N=247 (400)     | -6.56 (-10.30, -2.83)   | 4.0 (<0.001)             | -11.03 (-14.47, -7.60)   | 11.8 (<0.001)                |
| Outer Superior                   | N=247 (400)     | -13.07 (-17.89, -8.24)  | 8.9 (<0.001)             | -17.45 (-22.12, -12.78)  | 15.5 (<0.001)                |
| Outer Nasal                      | N=247 (400)     | -14.37 (-18.70, -10.04) | 12.8 (<0.001)            | -18.10 (-22.34, -13.86)  | 19.3 (<0.001)                |
| Outer Inferior                   | N=247 (400)     | -10.15 (-14.80, -5.50)  | 6.0 (<0.001)             | -14.92 (-19.32, -10.51)  | 13.1 (<0.001)                |

237  
238  
239  
240  
241

**Table 2.** Ocular associations with axial length

\*Linear mixed models slope estimates (with 95% confidence intervals) from univariable and multivariable models adjusted for age and VFMD. <sup>a</sup>R<sup>2</sup> reported as a percentage

Abbreviations: GCC; Ganglion cell complex, GCIPL; Ganglion cell inner plexiform layer, RNFL; Retinal nerve fiber layer, VFMD; Visual field mean deviation

**242 Associations with Severity of Glaucoma (Visual Field MD)**

243 In multivariable models adjusted for age and axial length we found relatively strong  
244 associations between thinner global and sectoral GCIPL measures and worse VFMD ( $R^2$   
245 range: 14.0%-38.1%, all  $p < 0.001$ ). Thinner mRNFL was also significantly associated with  
246 worse VFMD in all sectors ( $R^2$  range: 3.1%-23.8%, all  $p < 0.001$ ) with exception of the inner  
247 nasal and temporal sectors ( $p > 0.285$ ). Thinner global and sectoral Spectralis and Avanti  
248 GCC measures were significantly associated with worse VFMD ( $R^2$  range: from 20.2% to  
249 37.0% and 18.6% to 35.4%, all  $p < 0.001$ , respectively). In addition, we found a relatively  
250 strong association between lower macular vessel density and worse VFMD ( $R^2$  ranged from  
251 20.3% to 33.2%, all  $p < 0.001$ ). Macular choroidal thickness was not associated with VFMD  
252 (Table 3).

253

|                                      | Patients<br>(eyes) | Univariable<br>Regression |                          | Multivariable<br>Regression |                              |
|--------------------------------------|--------------------|---------------------------|--------------------------|-----------------------------|------------------------------|
|                                      |                    | Estimate                  | R <sup>2</sup> (p-value) | Estimate                    | R <sup>2</sup> (%) (p-value) |
| Age                                  | N=248 (401)        | -0.006 (-0.025, 0.014)    | 0.0 (0.558)              | -0.005 (-0.024, 0.015)      | 0.0 (0.636)                  |
| Axial length                         | N=248 (401)        | 0.002 (-0.007, 0.010)     | 0.0 (0.679)              | 0.001 (-0.008, 0.009)       | 0.0 (0.860)                  |
| <b>Spectralis GCIPL<br/>(µm)</b>     |                    |                           |                          |                             |                              |
| Global                               | N=248 (401)        | 0.88 (0.77, 0.99)         | 35.7 (<0.001)            | 0.86 (0.75, 0.97)           | 35.1 (<0.001)                |
| Inner ring                           | N=248 (401)        | 1.25 (1.10, 1.40)         | 38.1 (<0.001)            | 1.23 (1.08, 1.38)           | 37.5 (<0.001)                |
| Outer ring                           | N=248 (401)        | 0.51 (0.42, 0.59)         | 23.7 (<0.001)            | 0.49 (0.41, 0.57)           | 23.1 (<0.001)                |
| Inner temporal                       | N=248 (401)        | 1.40 (1.23, 1.58)         | 38.6 (<0.001)            | 1.39 (1.21, 1.57)           | 38.1 (<0.001)                |
| Inner superior                       | N=248 (401)        | 1.02 (0.85, 1.19)         | 24.0 (<0.001)            | 0.99 (0.82, 1.16)           | 23.1 (<0.001)                |
| Inner nasal                          | N=248 (401)        | 1.07 (0.90, 1.24)         | 25.1 (<0.001)            | 1.05 (0.88, 1.21)           | 24.4 (<0.001)                |
| Inner inferior                       | N=248 (401)        | 1.45 (1.25, 1.64)         | 35.6 (<0.001)            | 1.43 (1.23, 1.62)           | 34.8 (<0.001)                |
| Outer temporal                       | N=248 (401)        | 0.73 (0.63, 0.84)         | 31.5 (<0.001)            | 0.72 (0.61, 0.82)           | 30.7 (<0.001)                |
| Outer superior                       | N=248 (401)        | 0.43 (0.33, 0.53)         | 14.7 (<0.001)            | 0.41 (0.31, 0.51)           | 13.8 (<0.001)                |
| Outer nasal                          | N=248 (401)        | 0.46 (0.35, 0.56)         | 13.6 (<0.001)            | 0.43 (0.33, 0.53)           | 13.0 (<0.001)                |
| Outer inferior                       | N=248 (401)        | 0.40 (0.31, 0.49)         | 14.7 (<0.001)            | 0.39 (0.30, 0.48)           | 14.0 (<0.001)                |
| <b>Spectralis RNFL<br/>(µm)</b>      |                    |                           |                          |                             |                              |
| Global                               | N=248 (401)        | 0.26 (0.21, 0.31)         | 18.8 (<0.001)            | 0.27 (0.22, 0.32)           | 20.5 (<0.001)                |
| Inner ring                           | N=248 (401)        | 0.08 (0.04, 0.12)         | 3.5 (<0.001)             | 0.09 (0.05, 0.13)           | 4.4 (<0.001)                 |
| Outer ring                           | N=248 (401)        | 0.44 (0.37, 0.51)         | 26.2 (<0.001)            | 0.45 (0.38, 0.52)           | 27.5 (<0.001)                |
| Inner temporal                       | N=248 (401)        | 0.01 (-0.02, 0.04)        | 0.1 (0.599)              | 0.02 (-0.01, 0.05)          | 0.3 (0.285)                  |
| Inner superior                       | N=248 (401)        | 0.09 (0.04, 0.15)         | 2.5 (0.001)              | 0.10 (0.05, 0.16)           | 3.1 (<0.001)                 |
| Inner nasal                          | N=248 (401)        | 0.02 (-0.04, 0.07)        | 0.1 (0.543)              | 0.03 (-0.03, 0.08)          | 0.3 (0.315)                  |
| Inner inferior                       | N=248 (401)        | 0.19 (0.13, 0.25)         | 10.4 (<0.001)            | 0.20 (0.14, 0.25)           | 11.3 (<0.001)                |
| Outer temporal                       | N=248 (401)        | 0.05 (0.02, 0.09)         | 2.8 (<0.001)             | 0.06 (0.03, 0.10)           | 4.0 (<0.001)                 |
| Outer superior                       | N=248 (401)        | 0.52 (0.42, 0.62)         | 20.1 (<0.001)            | 0.53 (0.43, 0.63)           | 21.0 (<0.001)                |
| Outer nasal                          | N=248 (401)        | 0.63 (0.53, 0.74)         | 22.3 (<0.001)            | 0.65 (0.54, 0.75)           | 23.4 (<0.001)                |
| Outer inferior                       | N=248 (401)        | 0.56 (0.46, 0.67)         | 23.0 (<0.001)            | 0.58 (0.48, 0.68)           | 23.8 (<0.001)                |
| <b>Spectralis GCC<br/>(µm)</b>       |                    |                           |                          |                             |                              |
| Global                               | N=248 (401)        | 1.14 (0.99, 1.29)         | 34.0 (<0.001)            | 1.13 (0.98, 1.28)           | 33.4 (<0.001)                |
| Inner ring                           | N=248 (401)        | 1.33 (1.16, 1.51)         | 34.5 (<0.001)            | 1.32 (1.15, 1.49)           | 33.9 (<0.001)                |
| Outer ring                           | N=248 (401)        | 0.95 (0.81, 1.08)         | 29.1 (<0.001)            | 0.94 (0.81, 1.08)           | 28.6 (<0.001)                |
| Inner temporal                       | N=248 (401)        | 1.41 (1.23, 1.59)         | 37.5 (<0.001)            | 1.41 (1.23, 1.59)           | 37.0 (<0.001)                |
| Inner superior                       | N=248 (401)        | 1.12 (0.91, 1.32)         | 20.9 (<0.001)            | 1.10 (0.89, 1.31)           | 20.2 (<0.001)                |
| Inner nasal                          | N=248 (401)        | 1.10 (0.90, 1.29)         | 20.8 (<0.001)            | 1.09 (0.89, 1.28)           | 20.2 (<0.001)                |
| Inner inferior                       | N=248 (401)        | 1.64 (1.41, 1.87)         | 32.8 (<0.001)            | 1.63 (1.39, 1.86)           | 32.2 (<0.001)                |
| Outer temporal                       | N=248 (401)        | 0.78 (0.66, 0.91)         | 28.0 (<0.001)            | 0.78 (0.66, 0.90)           | 27.3 (<0.001)                |
| Outer superior                       | N=248 (401)        | 0.95 (0.77, 1.13)         | 20.8 (<0.001)            | 0.94 (0.76, 1.12)           | 20.4 (<0.001)                |
| Outer nasal                          | N=248 (401)        | 1.09 (0.91, 1.27)         | 22.9 (<0.001)            | 1.08 (0.90, 1.26)           | 22.4 (<0.001)                |
| Outer inferior                       | N=248 (401)        | 0.96 (0.79, 1.13)         | 22.4 (<0.001)            | 0.96 (0.79, 1.14)           | 22.1 (<0.001)                |
| <b>Avanti GCC (µm)</b>               |                    |                           |                          |                             |                              |
| Whole image                          | N=204 (317)        | 1.23 (1.05, 1.42)         | 31.2 (<0.001)            | 1.23 (1.04, 1.42)           | 30.9 (<0.001)                |
| Parafovea                            | N=204 (317)        | 1.33 (1.13, 1.53)         | 31.9 (<0.001)            | 1.32 (1.12, 1.52)           | 31.6 (<0.001)                |
| Temporal                             | N=204 (317)        | 1.42 (1.21, 1.63)         | 35.7 (<0.001)            | 1.41 (1.20, 1.62)           | 35.4 (<0.001)                |
| Superior                             | N=203 (316)        | 1.13 (0.88, 1.37)         | 18.9 (<0.001)            | 1.12 (0.87, 1.37)           | 18.6 (<0.001)                |
| Nasal                                | N=204 (317)        | 1.11 (0.90, 1.32)         | 20.2 (<0.001)            | 1.10 (0.89, 1.32)           | 20.0 (<0.001)                |
| Inferior                             | N=204 (316)        | 1.67 (1.40, 1.93)         | 32.3 (<0.001)            | 1.65 (1.39, 1.92)           | 31.9 (<0.001)                |
| <b>Avanti Vessel<br/>Density (%)</b> |                    |                           |                          |                             |                              |
| Whole image                          | N=204 (317)        | 0.46 (0.38, 0.53)         | 31.1 (<0.001)            | 0.44 (0.37, 0.52)           | 31.8 (<0.001)                |
| Parafovea                            | N=204 (317)        | 0.48 (0.40, 0.56)         | 31.0 (<0.001)            | 0.47 (0.39, 0.54)           | 31.9 (<0.001)                |
| Temporal                             | N=204 (317)        | 0.50 (0.42, 0.59)         | 31.7 (<0.001)            | 0.49 (0.41, 0.58)           | 31.6 (<0.001)                |
| Superior                             | N=203 (316)        | 0.42 (0.33, 0.50)         | 21.6 (<0.001)            | 0.40 (0.32, 0.49)           | 22.1 (<0.001)                |
| Nasal                                | N=204 (317)        | 0.39 (0.31, 0.48)         | 19.9 (<0.001)            | 0.38 (0.30, 0.47)           | 20.3 (<0.001)                |
| Inferior                             | N=204 (316)        | 0.62 (0.53, 0.72)         | 32.8 (<0.001)            | 0.61 (0.51, 0.70)           | 33.2 (<0.001)                |
| <b>Spectralis Choroid<br/>(µm)</b>   |                    |                           |                          |                             |                              |
| Global                               | N=247 (400)        | 0.35 (-0.11, 0.80)        | 0.3 (0.137)              | 0.25 (-0.19, 0.69)          | 0.2 (0.262)                  |
| Inner Ring                           | N=247 (400)        | 0.51 (-0.04, 1.06)        | 0.5 (0.068)              | 0.39 (-0.13, 0.92)          | 0.4 (0.144)                  |
| Outer Ring                           | N=247 (400)        | 0.31 (-0.14, 0.75)        | 0.2 (0.177)              | 0.21 (-0.22, 0.63)          | 0.2 (0.335)                  |
| Inner Temporal                       | N=247 (400)        | 0.43 (-0.17, 1.04)        | 0.4 (0.159)              | 0.27 (-0.30, 0.85)          | 0.2 (0.355)                  |
| Inner Superior                       | N=247 (400)        | 0.67 (0.01, 1.33)         | 0.7 (0.046)              | 0.49 (-0.14, 1.12)          | 0.5 (0.127)                  |
| Inner Nasal                          | N=247 (400)        | 0.77 (0.10, 1.44)         | 0.8 (0.025)              | 0.59 (-0.05, 1.22)          | 0.6 (0.071)                  |
| Inner Inferior                       | N=247 (400)        | 0.48 (-0.14, 1.10)        | 0.4 (0.130)              | 0.33 (-0.26, 0.93)          | 0.2 (0.274)                  |
| Outer Temporal                       | N=247 (400)        | 0.40 (-0.09, 0.88)        | 0.5 (0.108)              | 0.25 (-0.20, 0.71)          | 0.3 (0.281)                  |
| Outer Superior                       | N=247 (400)        | 0.27 (-0.33, 0.88)        | 0.1 (0.376)              | 0.12 (-0.46, 0.69)          | 0.0 (0.687)                  |
| Outer Nasal                          | N=247 (400)        | 0.34 (-0.20, 0.87)        | 0.2 (0.217)              | 0.18 (-0.32, 0.69)          | 0.1 (0.477)                  |
| Outer Inferior                       | N=247 (400)        | 0.46 (-0.11, 1.02)        | 0.4 (0.118)              | 0.32 (-0.23, 0.86)          | 0.2 (0.253)                  |

254  
255  
256  
257  
258

**Table 3.** Ocular characteristics associations with Visual Field mean deviation

\*Linear mixed models slope estimates (with 95% confidence intervals) from univariable and multivariable models adjusted for age and axial length.

^R<sup>2</sup> reported as a percentage

Abbreviations: GCC; Ganglion cell complex, GCIPL; Ganglion cell inner plexiform layer, RNFL; Retinal nerve fiber layer

## 259 **Secondary Analysis of Differences by Axial Myopia Group**

260 As a secondary analysis, we compared macular thickness- and vascular measurement  
261 differences across the three axial myopia groups and adjusted for age and VFMD. In  
262 general, mRNFL was thickest in high myopic eyes in all sectors, while mCT was significantly  
263 thinner in all sectors in high myopic eyes. The pattern of other macular thickness and vessel  
264 density measurements were less consistent across the three axial myopia groups  
265 (Supplemental Table 1 and Figures 2A-2F.)

266

267 Specifically, global and sectoral GCC (both Spectralis and Avanti) and GCIPL thickness  
268 values were similar across myopic groups, except for the inner and outer nasal rings, and  
269 inferior outer ring GCIPL (all  $p \leq 0.033$ ) (see Figures 2A, 2C and 2D). Compared to no and  
270 mild myopia groups, thicker mRNFL was generally found in high myopes globally and in  
271 specific sectors (age and VF adjusted MD global:  $p=0.031$ , global inner:  $p=0.051$ , global  
272 outer  $p=0.042$ , inner superior ring  $p=0.001$  and outer superior ring ( $p=0.017$ ) (Figure 2B).  
273 Parafoveal vessel density tended to be slightly higher in non-myopes compared to mild and  
274 high myopes, but only reached statistical significance in the nasal sector (mean [95% CI]);  
275 nasal vessel density in high myopes (42.7% [40.7%, 44.6%]) and non-myopes (44.5%  
276 [43.3%, 45.7%]) ( $p=0.011$ ) (Figure 2E). Global and sectoral mean MCT was significantly  
277 thinner in high myopes compared to mild and non-myopes (all  $p < 0.001$ , See Figure 2F).

278

## 279 **Discussion**

280 The results of this work have implications for diagnosing glaucoma in the challenging  
281 patients with high myopia. Specifically, our results suggest that macula measurements can  
282 be useful measurements to diagnose and monitor glaucoma in myopic eyes as the GCIPL  
283 and GCC thinned with increasing severity of glaucoma but are not associated with axial  
284 length. Except for choroidal thickness, all other macula thickness measures obtained in this  
285 study were associated with the severity of glaucoma. Because ganglion cell-related macular

Rezapour J

286 thickness measurements are strongly associated with VFMD but do not vary with axial  
287 length, GCIPL and GCC show promise for detecting glaucoma in myopic eyes.  
288  
289 Because the macula is devoid of morphometric variations such as tilt and peripapillary  
290 atrophy, it's diagnostic role in detecting glaucoma in highly myopic eyes is gaining more  
291 attention recently. Specifically, there is evidence that myopia can lead to a high rate of false-  
292 positives in the measurement of the peripapillary RNFL (pRNFL).<sup>23</sup> Several studies have  
293 examined the diagnostic ability of GCIPL, pRNFL and GCC and reported that GCIPL  
294 thickness has been reported as superior<sup>8 9 24-27</sup> or comparable to pRNFL thickness<sup>28</sup> for  
295 diagnosing glaucoma in myopic eyes. Shoji et al. found that GCC parameters had high  
296 diagnostic accuracy to detect glaucoma in highly myopic eyes and that the diagnostic ability  
297 was higher than that of the pRNFL.<sup>8</sup> In another study, these authors reported that GCC  
298 parameters were not significantly related to refractive errors and had good accuracy to detect  
299 glaucoma in non-myopes and in high myopes.<sup>9</sup> Similarly, Kim et al. determined that in highly  
300 myopic eyes, the accuracy of glaucoma detection based on the macular GCC thickness was  
301 comparable to that based on the pRNFL thickness.<sup>29</sup> These findings and those of other  
302 studies<sup>8 9 27</sup> are consistent with our results that GCIPL and GCC thickness measured using  
303 both Spectralis and Avanti showed no association between the GCIPL thickness and axial  
304 length suggesting GCIPL thickness is less sensitive to changes due to axial elongation.  
305 Moreover, in our study GCIPL and GCC measurements showed the strongest association  
306 with VFMD, suggesting that both are useful for measuring ganglion cell loss associated with  
307 glaucoma in both non-highly myopic and highly myopic eyes. These results are generalizable  
308 across instruments as both Spectralis GCC and Avanti GCC showed similar results.  
309  
310 High myopia is characterized by marked structural changes in the retina and choroid and the  
311 corresponding vasculature.<sup>30 31</sup> With the introduction of the non-invasive technique, OCTA  
312 images can provide a microvascular map from different retinal layers. To the best of our

Rezapour J

313 knowledge this is the first study comparing both macular tissue thickness and vascular  
314 measurements in axial non-myopic, mild and high myopic glaucomatous eyes.  
315 In the current study, the macular vessel density showed a weak association with axial length  
316 and a moderate association with VFMD. Previous studies reported conflicting results. This  
317 inconsistency can be explained in part by differences in study populations and image  
318 acquisition and analysis protocols. For instance, we employed a 3 x 3 mm imaging area  
319 whereas Yang et al. employed a larger 6 x 6 mm area.<sup>31</sup> A large scan size can be more  
320 sensitive to image artefacts but also may identify microvasculature dropout in outer regions.<sup>31</sup>  
321 We found only a weak association between superficial macula vessel density and axial  
322 length but a moderate association between vessel density and VFMD. Our results suggest  
323 that although myopic changes might affect vessel density in the macula, effects due to  
324 glaucoma are much stronger as indicated by the stronger association to the VFMD and  
325 therefore may also be useful for monitoring glaucoma in myopic eyes.<sup>32</sup>  
326  
327 In terms of choroidal thickness, as axial length increased, the choroid thinned in all sectors.  
328 Previously reported results have demonstrated choroidal thinning in highly myopic eyes.<sup>33-35</sup>  
329 Ho et al.<sup>33</sup> reported that subfoveal choroidal thickness decreased by 6.20  $\mu\text{m}$  for each diopter  
330 of myopia and was thinnest in the nasal sectors in all groups, which is similar to the  
331 distributions of non-axial myopes, mild axial myopes and high axial myopes in our study. The  
332 choroid is a highly vascular layer, supplied by the posterior ciliary arteries and provides the  
333 retinal photoreceptors and the retinal pigment epithelium with oxygen and nourishment.<sup>36</sup> Our  
334 results did not show an association between choroidal thickness and VFMD which suggests  
335 that choroidal thickness likely is not a useful metric for differentiating glaucomatous from  
336 healthy eyes or for monitoring glaucomatous progression.  
337  
338 The current study has several limitations. First, individuals with high myopia were younger.  
339 As retinal tissue is known to thin in older eyes<sup>37</sup> we adjusted for age and VFMD in all  
340 analyses. In addition, we compared the 3 axial myopic groups after age-matching and found

Rezapour J

341 similar results (data not shown) with respect to the pattern of the retinal and vascular  
342 measurements in the three groups. Second, it has been suggested that axial length might  
343 affect retinal vessel density measurements and lead to incorrect scaling in OCTA imaging,  
344 which should be taken into account when interpreting our results.<sup>38</sup> Moreover, as vessel  
345 density measurements vary across instruments,<sup>39</sup> these sVD results are not necessarily  
346 generalizable to macula vessel density measurements from other OCTA instruments or to  
347 macula deep layer vessel density measurements. In addition, axial elongation often leads to  
348 retinal layer segmentation errors and measurement failures. However, we reviewed the OCT  
349 images meticulously for segmentation errors and excluded data with uncorrectable  
350 segmentation failures. Finally, the sample size of the high myopic group was relatively small  
351 compared to the other two groups and the mean axial length was only 26.5 mm. We can  
352 therefore not generalize our results to eyes with longer axial length.

353

354 In conclusion, GCIPL and GCC thickness can be useful measurements to diagnose and  
355 monitor glaucoma in myopic eyes as they thinned with increasing severity of glaucoma but  
356 did not vary with axial length. Macular sVD may also be useful for detecting glaucoma in  
357 myopic eyes, however we found a weak association between vessel density and axial length  
358 which needs to be explored further.

359

## 360 **Funding**

### 361 Grant support:

362 JR: German Research Foundation research fellowship grant recipient (RE 4155/1-1) and  
363 German Ophthalmological Society Grant

364 MC: K99EY030942

365 SM: Tobacco-Related Disease Research Program T31IP1511

366 RNW: National Eye Institute R01EY029058, an Unrestricted grant from Research to Prevent  
367 Blindness (New York, NY)

368 LMZ: National Eye Institute R01EY011008, R01EY019869, R01EY027510, P30EY022589

369

### 370 Competing Interests:

371 None: JR, CB, JD, AB, JAP, MC, LH, JBJ, RCP, SM, HH, MAF



Rezapour J

372 RNW: Consulting: Bausch & Lomb, Eyenovia, Aerie Pharmaceuticals, Allergan; Research  
373 Funding or Equipment: Bausch & Lomb, Heidelberg Engineering, Carl Zeiss Meditec, Konan  
374 Medical, Genentech, Optos, Optovue, Centervue; Patent: Toromedes, Carl Zeiss Meditec-  
375 Zeiss  
376 LMZ: Research Funding and Equipment: Heidelberg Engineering; Research Equipment:  
377 Optovue Inc, Carl Zeiss Meditec Inc, Topcon Medical Systems Inc; Patent: Carl Zeiss  
378 Meditec.  
379  
380  
381

382 **References**

- 383 1. Marcus MW, de Vries MM, Junoy Montolio FG, et al. Myopia as a risk factor for open-angle  
384 glaucoma: a systematic review and meta-analysis. *Ophthalmology* 2011;118(10):1989-94 e2.  
385 doi: 10.1016/j.ophtha.2011.03.012 [published Online First: 2011/06/21]
- 386 2. Leung CK, Cheung CY, Weinreb RN, et al. Retinal nerve fiber layer imaging with spectral-domain  
387 optical coherence tomography: a variability and diagnostic performance study.  
388 *Ophthalmology* 2009;116(7):1257-63, 63 e1-2. doi: 10.1016/j.ophtha.2009.04.013 [published  
389 Online First: 2009/05/26]
- 390 3. Jonas JB, Gusek GC, Naumann GO. Optic disk morphometry in high myopia. *Graefe's archive for*  
391 *clinical and experimental ophthalmology = Albrecht von Graefes Archiv fur klinische und*  
392 *experimentelle Ophthalmologie* 1988;226(6):587-90. doi: 10.1007/BF02169209 [published  
393 Online First: 1988/01/01]
- 394 4. Leung CK, Mohamed S, Leung KS, et al. Retinal nerve fiber layer measurements in myopia: An  
395 optical coherence tomography study. *Investigative ophthalmology & visual science*  
396 2006;47(12):5171-6. doi: 10.1167/iovs.06-0545 [published Online First: 2006/11/24]
- 397 5. Leung CK, Yu M, Weinreb RN, et al. Retinal nerve fiber layer imaging with spectral-domain optical  
398 coherence tomography: interpreting the RNFL maps in healthy myopic eyes. *Investigative*  
399 *ophthalmology & visual science* 2012;53(11):7194-200. doi: 10.1167/iovs.12-9726 [published  
400 Online First: 2012/09/22]
- 401 6. Curcio CA, Allen KA. Topography of ganglion cells in human retina. *The Journal of comparative*  
402 *neurology* 1990;300(1):5-25. doi: 10.1002/cne.903000103 [published Online First:  
403 1990/10/01]
- 404 7. Hood DC, Raza AS, de Moraes CG, et al. Glaucomatous damage of the macula. *Progress in retinal*  
405 *and eye research* 2013;32:1-21. doi: 10.1016/j.preteyeres.2012.08.003 [published Online  
406 First: 2012/09/22]
- 407 8. Shoji T, Sato H, Ishida M, et al. Assessment of glaucomatous changes in subjects with high myopia  
408 using spectral domain optical coherence tomography. *Investigative ophthalmology & visual*  
409 *science* 2011;52(2):1098-102. doi: 10.1167/iovs.10-5922 [published Online First: 2010/11/06]
- 410 9. Shoji T, Nagaoka Y, Sato H, et al. Impact of high myopia on the performance of SD-OCT parameters  
411 to detect glaucoma. *Graefe's archive for clinical and experimental ophthalmology = Albrecht*  
412 *von Graefes Archiv fur klinische und experimentelle Ophthalmologie* 2012;250(12):1843-9.  
413 doi: 10.1007/s00417-012-1994-8 [published Online First: 2012/05/05]
- 414 10. Akashi A, Kanamori A, Nakamura M, et al. The ability of macular parameters and circumpapillary  
415 retinal nerve fiber layer by three SD-OCT instruments to diagnose highly myopic glaucoma.  
416 *Investigative ophthalmology & visual science* 2013;54(9):6025-32. doi: 10.1167/iovs.13-  
417 12630 [published Online First: 2013/08/03]
- 418 11. Nakanishi H, Akagi T, Hangai M, et al. Effect of Axial Length on Macular Ganglion Cell Complex  
419 Thickness and on Early Glaucoma Diagnosis by Spectral-Domain Optical Coherence  
420 Tomography. *Journal of glaucoma* 2016;25(5):e481-90. doi: 10.1097/IJG.0000000000000330  
421 [published Online First: 2015/11/10]
- 422 12. Hung KC, Wu PC, Poon YC, et al. Macular Diagnostic Ability in OCT for Assessing Glaucoma in High  
423 Myopia. *Optometry and vision science : official publication of the American Academy of*  
424 *Optometry* 2016;93(2):126-35. doi: 10.1097/OPX.0000000000000776 [published Online First:  
425 2015/12/26]
- 426 13. Wu J, Sebastian RT, Chu CJ, et al. Reduced Macular Vessel Density and Capillary Perfusion in  
427 Glaucoma Detected Using OCT Angiography. *Current eye research* 2019;44(5):533-40. doi:  
428 10.1080/02713683.2018.1563195 [published Online First: 2018/12/24]
- 429 14. Moghimi S, Zangwill LM, Pentecost RC, et al. Macular and Optic Nerve Head Vessel Density and  
430 Progressive Retinal Nerve Fiber Layer Loss in Glaucoma. *Ophthalmology* 2018;125(11):1720-  
431 28. doi: 10.1016/j.ophtha.2018.05.006 [published Online First: 2018/06/17]

- 432 15. Gupta P, Cheung CY, Saw SM, et al. Peripapillary choroidal thickness in young Asians with high  
433 myopia. *Investigative ophthalmology & visual science* 2015;56(3):1475-81. doi:  
434 10.1167/iovs.14-15742 [published Online First: 2015/02/07]
- 435 16. Yang H, Luo H, Gardiner SK, et al. Factors Influencing Optical Coherence Tomography Peripapillary  
436 Choroidal Thickness: A Multicenter Study. *Investigative ophthalmology & visual science*  
437 2019;60(2):795-806. doi: 10.1167/iovs.18-25407 [published Online First: 2019/02/28]
- 438 17. Flores-Moreno I, Lugo F, Duker JS, et al. The relationship between axial length and choroidal  
439 thickness in eyes with high myopia. *American journal of ophthalmology* 2013;155(2):314-19  
440 e1. doi: 10.1016/j.ajo.2012.07.015 [published Online First: 2012/10/06]
- 441 18. Ikuno Y, Tano Y. Retinal and choroidal biometry in highly myopic eyes with spectral-domain  
442 optical coherence tomography. *Investigative ophthalmology & visual science*  
443 2009;50(8):3876-80. doi: 10.1167/iovs.08-3325 [published Online First: 2009/03/13]
- 444 19. Sample PA, Girkin CA, Zangwill LM, et al. The African Descent and Glaucoma Evaluation Study  
445 (ADAGES): design and baseline data. *Arch Ophthalmol* 2009;127(9):1136-45. doi:  
446 10.1001/archophthalmol.2009.187
- 447 20. Ghahari E, Bowd C, Zangwill LM, et al. Macular Vessel Density in Glaucomatous Eyes With Focal  
448 Lamina Cribrosa Defects. *J Glaucoma* 2018;27(4):342-49. doi:  
449 10.1097/IJG.0000000000000922 [published Online First: 2018/02/21]
- 450 21. Rezapour J, Bowd C, Dohleman J, et al. The influence of axial myopia on optic disc characteristics  
451 of glaucoma eyes. *Sci Rep* 2021;11(1):8854. doi: 10.1038/s41598-021-88406-1 [published  
452 Online First: 2021/04/25]
- 453 22. Hongmei Song, Wenguan Wang, Sanyuan Zhao, Jianbing Shen, Kin-Man Lam; Pyramid Dilated  
454 Deeper ConvLSTM for Video Salient Object Detection Proceedings of the European  
455 Conference on Computer Vision (ECCV), 2018, pp. 715-731.
- 456 23. Biswas S, Lin C, Leung CK. Evaluation of a Myopic Normative Database for Analysis of Retinal  
457 Nerve Fiber Layer Thickness. *JAMA Ophthalmol* 2016;134(9):1032-9. doi:  
458 10.1001/jamaophthalmol.2016.2343 [published Online First: 2016/07/22]
- 459 24. Seol BR, Jeoung JW, Park KH. Glaucoma Detection Ability of Macular Ganglion Cell-Inner  
460 Plexiform Layer Thickness in Myopic Preperimetric Glaucoma. *Investigative ophthalmology &*  
461 *visual science* 2015;56(13):8306-13. doi: 10.1167/iovs.15-18141 [published Online First:  
462 2016/01/01]
- 463 25. Kim YK, Yoo BW, Jeoung JW, et al. Glaucoma-Diagnostic Ability of Ganglion Cell-Inner Plexiform  
464 Layer Thickness Difference Across Temporal Raphe in Highly Myopic Eyes. *Investigative*  
465 *ophthalmology & visual science* 2016;57(14):5856-63. doi: 10.1167/iovs.16-20116 [published  
466 Online First: 2016/11/02]
- 467 26. Baek SU, Kim KE, Kim YK, et al. Development of Topographic Scoring System for Identifying  
468 Glaucoma in Myopic Eyes: A Spectral-Domain OCT Study. *Ophthalmology* 2018;125(11):1710-  
469 19. doi: 10.1016/j.ophtha.2018.05.002 [published Online First: 2018/06/12]
- 470 27. Yang Z, Tatham AJ, Weinreb RN, et al. Diagnostic ability of macular ganglion cell inner plexiform  
471 layer measurements in glaucoma using swept source and spectral domain optical coherence  
472 tomography. *PLoS One* 2015;10(5):e0125957. doi: 10.1371/journal.pone.0125957
- 473 28. Choi YJ, Jeoung JW, Park KH, et al. Glaucoma detection ability of ganglion cell-inner plexiform  
474 layer thickness by spectral-domain optical coherence tomography in high myopia.  
475 *Investigative ophthalmology & visual science* 2013;54(3):2296-304. doi: 10.1167/iovs.12-  
476 10530 [published Online First: 2013/03/07]
- 477 29. Kim NR, Lee ES, Seong GJ, et al. Comparing the ganglion cell complex and retinal nerve fibre layer  
478 measurements by Fourier domain OCT to detect glaucoma in high myopia. *The British journal*  
479 *of ophthalmology* 2011;95(8):1115-21. doi: 10.1136/bjo.2010.182493 [published Online First:  
480 2010/09/02]
- 481 30. Ye J, Wang M, Shen M, et al. Deep Retinal Capillary Plexus Decreasing Correlated With the Outer  
482 Retinal Layer Alteration and Visual Acuity Impairment in Pathological Myopia. *Investigative*

- 483            *ophthalmology & visual science* 2020;61(4):45. doi: 10.1167/iovs.61.4.45 [published Online  
484            First: 2020/04/29]
- 485    31. Yang D, Cao D, Zhang L, et al. Macular and peripapillary vessel density in myopic eyes of young  
486            Chinese adults. *Clinical & experimental optometry* 2020;103(6):830-37. doi:  
487            10.1111/cxo.13047 [published Online First: 2020/02/14]
- 488    32. Lee K, Maeng KJ, Kim JY, et al. Diagnostic ability of vessel density measured by spectral-domain  
489            optical coherence tomography angiography for glaucoma in patients with high myopia.  
490            *Scientific reports* 2020;10(1):3027. doi: 10.1038/s41598-020-60051-0 [published Online First:  
491            2020/02/23]
- 492    33. Ho M, Liu DT, Chan VC, et al. Choroidal thickness measurement in myopic eyes by enhanced  
493            depth optical coherence tomography. *Ophthalmology* 2013;120(9):1909-14. doi:  
494            10.1016/j.ophtha.2013.02.005 [published Online First: 2013/05/21]
- 495    34. Harb E, Hyman L, Gwiazda J, et al. Choroidal Thickness Profiles in Myopic Eyes of Young Adults in  
496            the Correction of Myopia Evaluation Trial Cohort. *Am J Ophthalmol* 2015;160(1):62-71 e2.  
497            doi: 10.1016/j.ajo.2015.04.018
- 498    35. Wei WB, Xu L, Jonas JB, et al. Subfoveal choroidal thickness: the Beijing Eye Study.  
499            *Ophthalmology* 2013;120(1):175-80. doi: 10.1016/j.ophtha.2012.07.048 [published Online  
500            First: 2012/09/27]
- 501    36. Linsenmeier RA, Padnick-Silver L. Metabolic dependence of photoreceptors on the choroid in the  
502            normal and detached retina. *Investigative ophthalmology & visual science* 2000;41(10):3117-  
503            23. [published Online First: 2000/09/01]
- 504    37. Hammel N, Belghith A, Bowd C, et al. Rate and Pattern of Rim Area Loss in Healthy and  
505            Progressing Glaucoma Eyes. *Ophthalmology* 2016;123(4):760-70. doi:  
506            10.1016/j.ophtha.2015.11.018 [published Online First: 2016/01/10]
- 507    38. Sampson DM, Gong P, An D, et al. Axial Length Variation Impacts on Superficial Retinal Vessel  
508            Density and Foveal Avascular Zone Area Measurements Using Optical Coherence  
509            Tomography Angiography. *Investigative ophthalmology & visual science* 2017;58(7):3065-72.  
510            doi: 10.1167/iovs.17-21551 [published Online First: 2017/06/18]
- 511    39. Li XX, Wu W, Zhou H, et al. A quantitative comparison of five optical coherence tomography  
512            angiography systems in clinical performance. *International journal of ophthalmology*  
513            2018;11(11):1784-95. doi: 10.18240/ijo.2018.11.09 [published Online First: 2018/11/20]
- 514
- 515

516 **Figure Legends**

517

518 **Figure 1:** Optic disc photograph (left), optical coherence tomography optic nerve head en  
519 face image (middle) and optical coherence tomography macula posterior pole image (right)  
520 of an eye with (A) no axial myopia (axial length = 23.8 mm), (B) mild axial myopia (axial  
521 length = 24.7 mm and (C) high axial myopia (axial length = 29 mm).

522

523 **Figure 2:** Sectoral and global thickness distribution of the Spectralis GCIPL thickness (1A),  
524 Spectralis macular RNFL thickness (1B), Spectralis GCC thickness (1C), Avanti GCC  
525 thickness (1D), Avanti macular vessel density (1E) and Spectralis macular choroidal  
526 thickness (1F) in non-myopic, mild myopic and highly myopic glaucoma eyes.  
527 Abbreviations: GCC; ganglion cell complex, GCIPL; ganglion cell inner plexiform layer,  
528 RNFL; retinal nerve fiber layer

**A**  $AL \leq 24$  mm

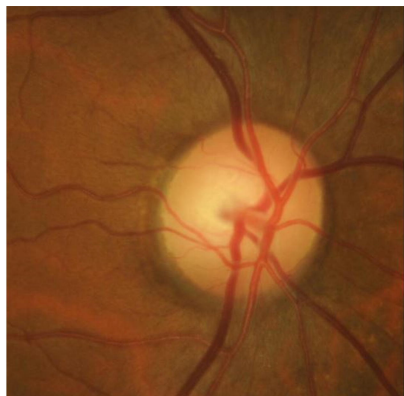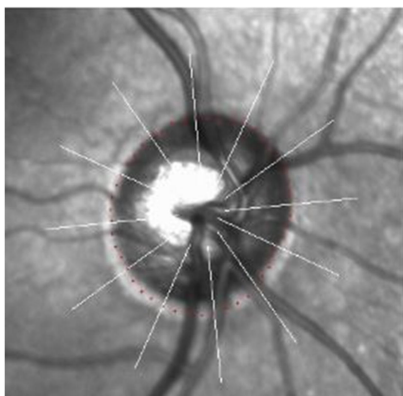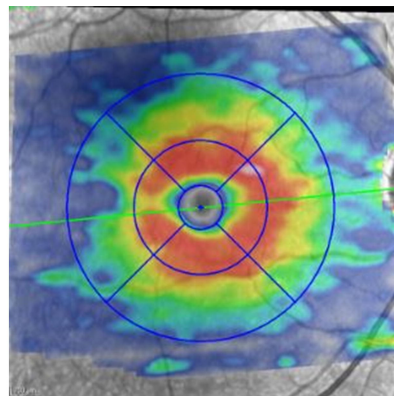

**B**  $24$  mm  $< AL \leq 26$  mm

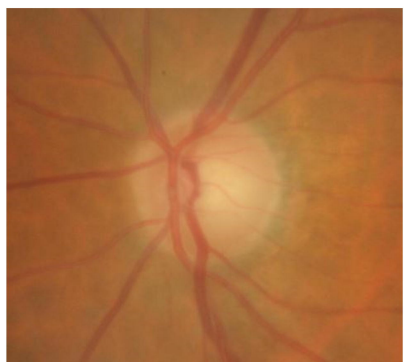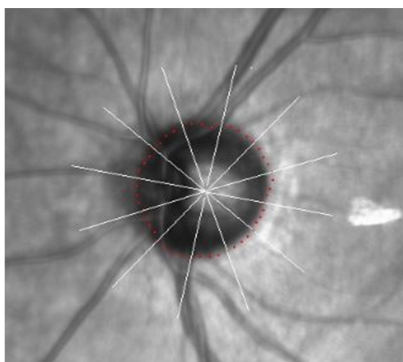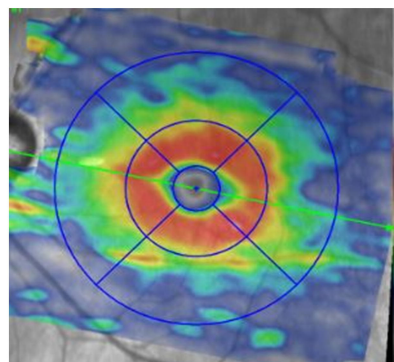

**C**  $AL > 26$  mm

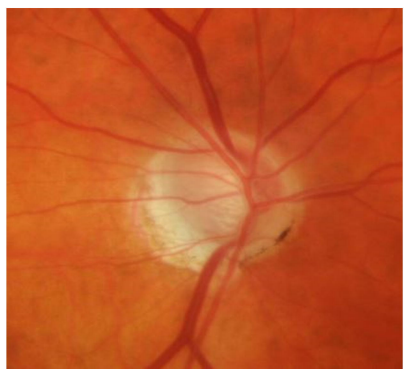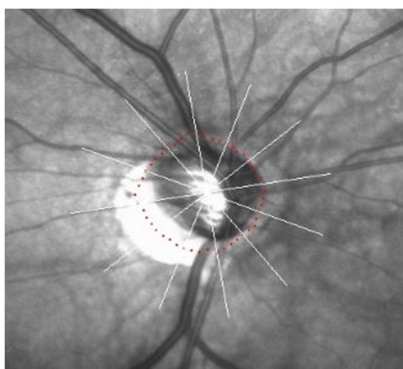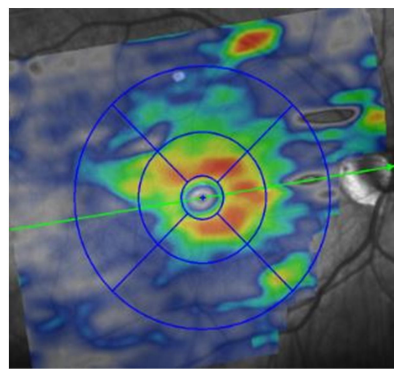



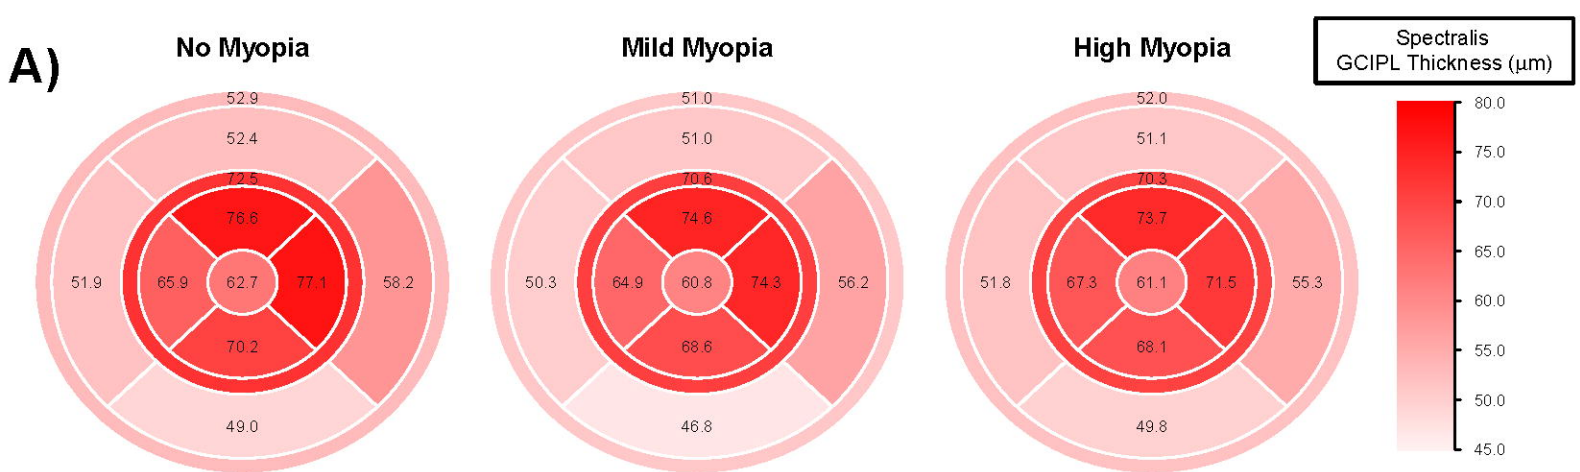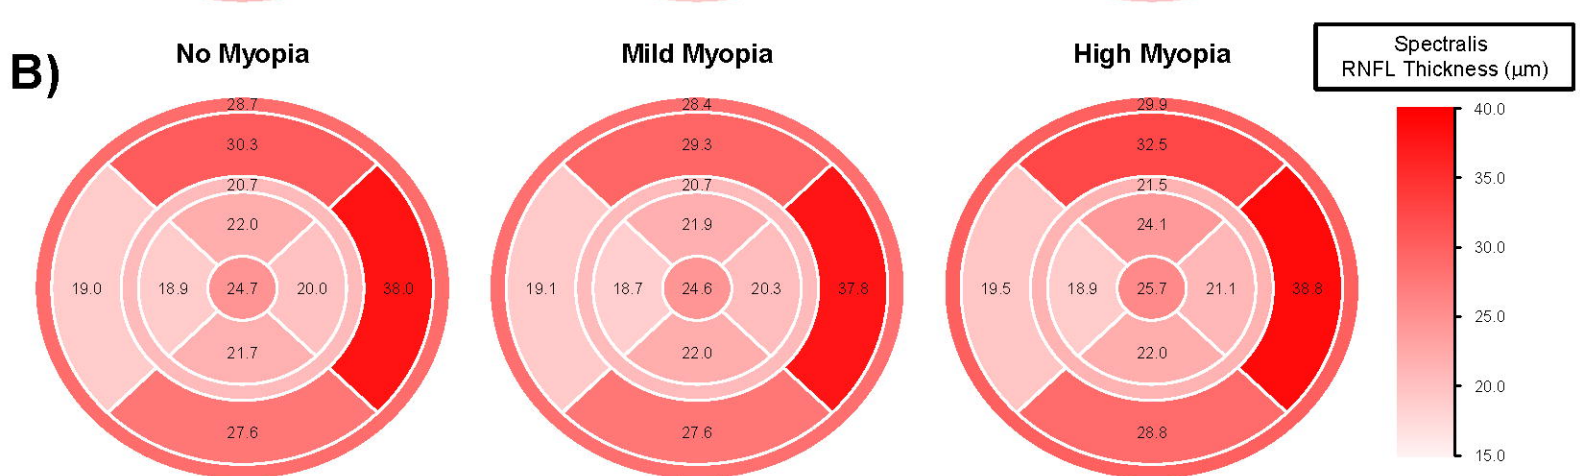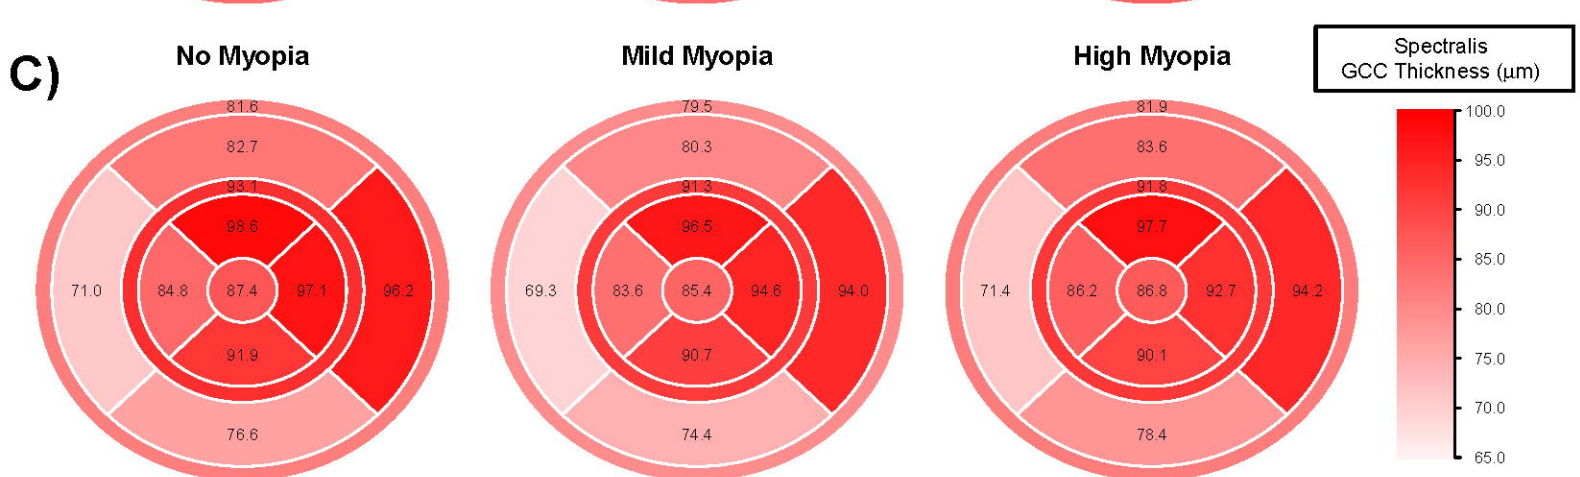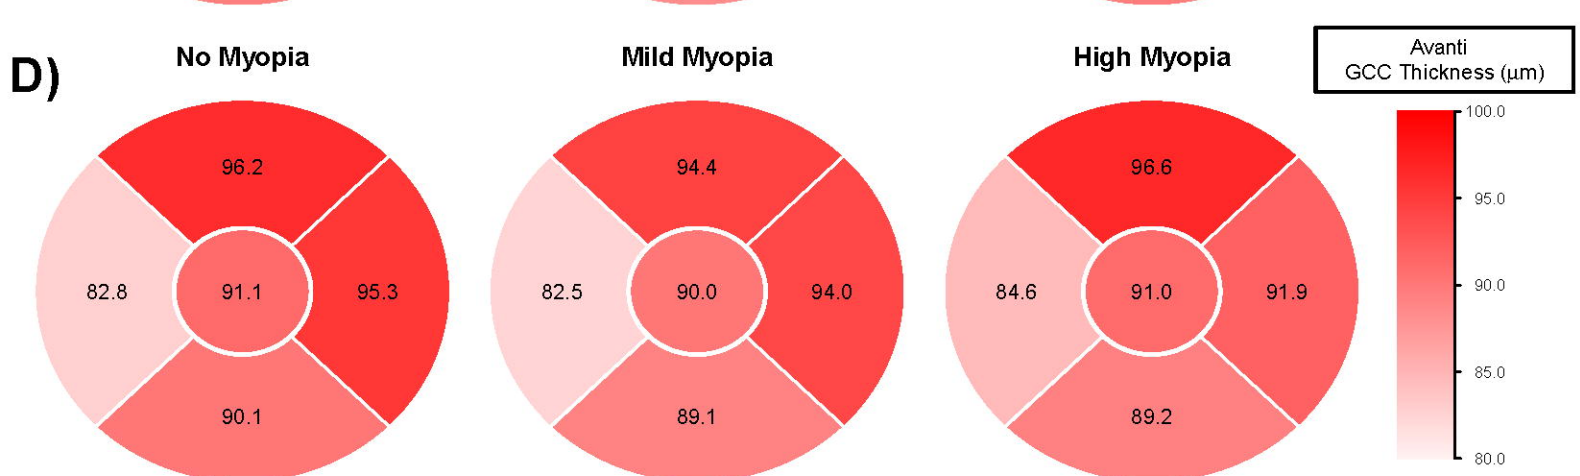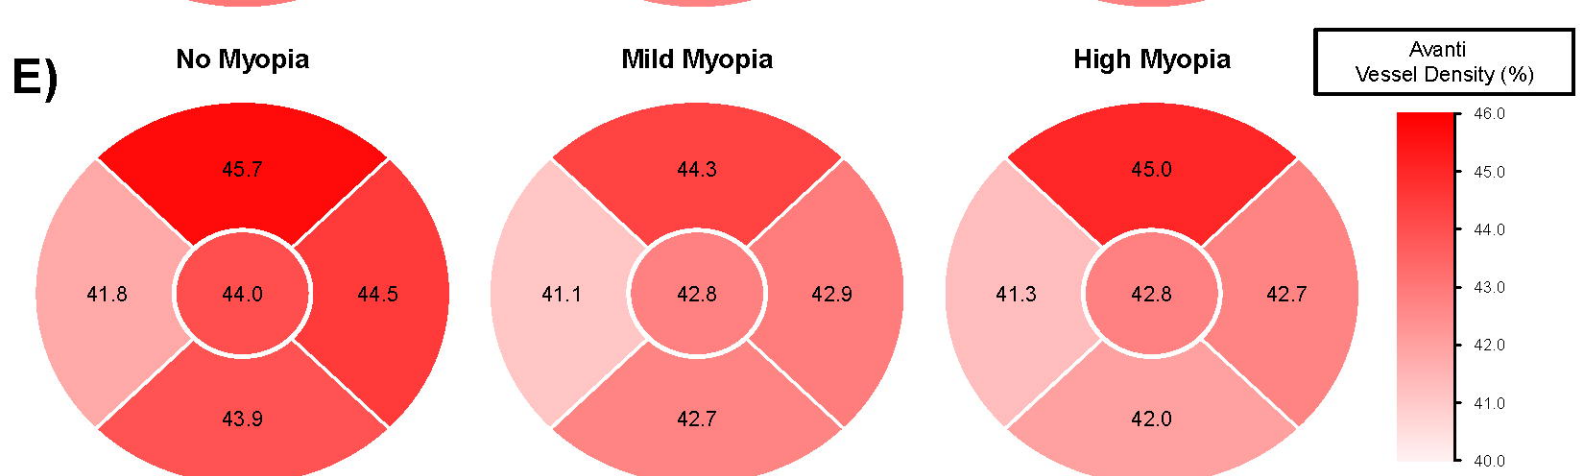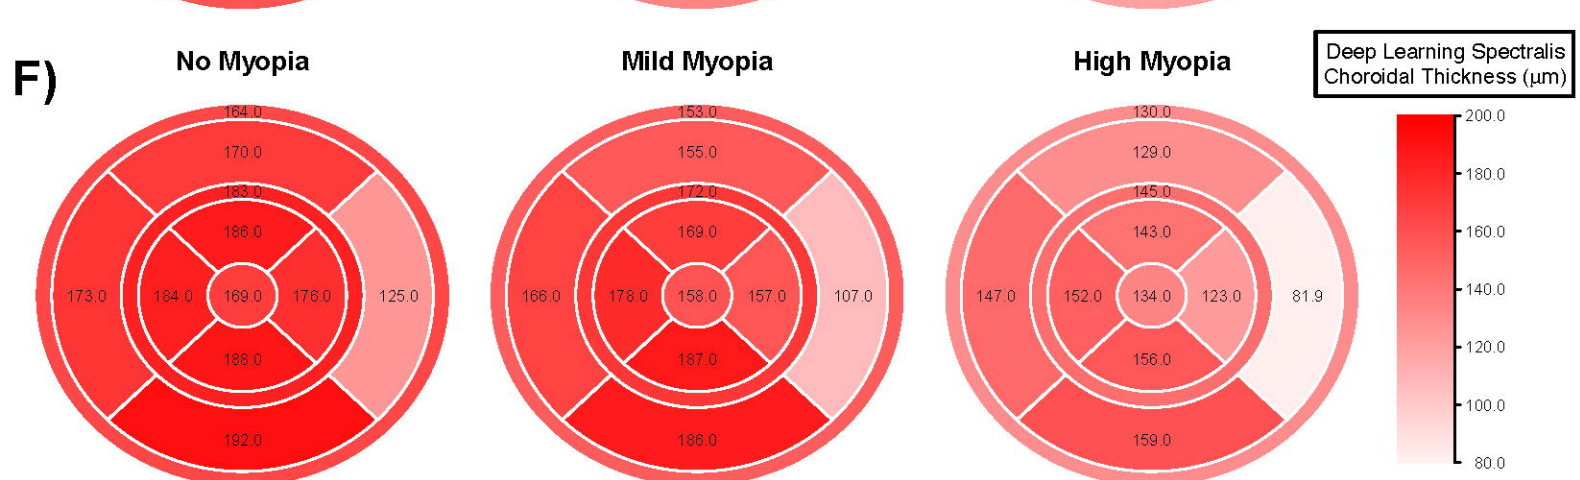

Source: https://medrxiv.org/content/10.1101/2021.09.02.21263045v1.full.pdf
